# Supplementary material
Source: PubMed Central journal article supplement (PMC5930895)
Supplement: tpmd170622.SD1.pdf [file tpmd170622.SD1.pdf]

## SUPPLEMENTAL TABLE 1

## List of key publications used for the hand search of references during the literature search

List of key publications (hand-search)

- 1) Erlanger TE, Weiss S, Keiser J, Utzinger J, Wiedenmayer K, 2009. Past, present and future of Japanese encephalitis. *Emerg Infect Dis* 15: 1–7.
- 2) Huang YJS, Higgs S, Horne KM, Vanlandingham DL, 2014. Flavivirus-mosquito interactions. *Viruses* 6: 4704–4730.
- 3) Le Flohic G, Porphyre V, Barbazan P, Gonzalez JP, 2013. Review of climate, landscape, and viral genetics as drivers of the Japanese encephalitis virus ecology. *PLoS Negl Trop Dis* 7: 1–7.
- 4) Mackenzie JS, Gubler DJ, Petersen LR, 2004. Emerging flaviviruses: the spread and resurgence of Japanese encephalitis, West Nile and dengue viruses. *Nat Med* 10: 98–109.
- 5) Misra UK, Kalita J, 2010. Overview: Japanese encephalitis. *Prog Neurobiol* 91: 108–120.
- 6) Nett RJ, Campbell GL, Reisen WK, 2009. Potential for the emergence of Japanese encephalitis virus in California. *Vector Borne Zoonotic Dis* 9: 511–517.
- 7) Solomon T, Dung NM, Kneen R, Gainsborough M, Vaughn D, Khanh VT, 2000. Japanese encephalitis. *J Neurol Neurosurg Psychiatry* 68: 405–415.
- 8) van den Hurk AF, Ritchie SA, Mackenzie JS, 2009. Ecology and geographical expansion of Japanese encephalitis virus. *Annu Rev Entomol* 54: 17–35.
- 9) Weaver S, Barrett ADT, 2004. Transmission cycles, host range, evolution and emergence of arboviral disease. *Nat Rev Microbiol* 2: 789–801.

SUPPLEMENTAL TABLE 2

Source of relevant articles included in the systematic review, by outcome (N = 171)

|                   | Number of articles (n) | References                                                                                                                                                                                                                                                                                                                                                                                                                                                                                                                                                                                                                                                                                                                                                                                                                                                                                                                                                                                                                                                                                                                                                                                                                                                                                                                                                                                                                                                                                                                                                                                                                                                                                                                                                                                                                                                                                                                                                                                                                                                                                                                                                                                                                                                                                                                                                                                                                                                                                                                                                                                                                                                                                                                                                                                                                                                                                                                                                                                                                                                                                                                                                                                                                                                                                                                                                                                                                                                                                                                                                                                                                                                                                                                                                                                                                                                                                                                                                                                                                                                                                                                                                                                                                                                                                                                                                                                                                                                                                                                                                                                                                                                                                                                                                                                                                                                                                                                                                                                                                                                                                                                                                                                                                                                                                                                                                                                                                                                                                                                                                                                                                                                                                                                                                           |
|-------------------|------------------------|----------------------------------------------------------------------------------------------------------------------------------------------------------------------------------------------------------------------------------------------------------------------------------------------------------------------------------------------------------------------------------------------------------------------------------------------------------------------------------------------------------------------------------------------------------------------------------------------------------------------------------------------------------------------------------------------------------------------------------------------------------------------------------------------------------------------------------------------------------------------------------------------------------------------------------------------------------------------------------------------------------------------------------------------------------------------------------------------------------------------------------------------------------------------------------------------------------------------------------------------------------------------------------------------------------------------------------------------------------------------------------------------------------------------------------------------------------------------------------------------------------------------------------------------------------------------------------------------------------------------------------------------------------------------------------------------------------------------------------------------------------------------------------------------------------------------------------------------------------------------------------------------------------------------------------------------------------------------------------------------------------------------------------------------------------------------------------------------------------------------------------------------------------------------------------------------------------------------------------------------------------------------------------------------------------------------------------------------------------------------------------------------------------------------------------------------------------------------------------------------------------------------------------------------------------------------------------------------------------------------------------------------------------------------------------------------------------------------------------------------------------------------------------------------------------------------------------------------------------------------------------------------------------------------------------------------------------------------------------------------------------------------------------------------------------------------------------------------------------------------------------------------------------------------------------------------------------------------------------------------------------------------------------------------------------------------------------------------------------------------------------------------------------------------------------------------------------------------------------------------------------------------------------------------------------------------------------------------------------------------------------------------------------------------------------------------------------------------------------------------------------------------------------------------------------------------------------------------------------------------------------------------------------------------------------------------------------------------------------------------------------------------------------------------------------------------------------------------------------------------------------------------------------------------------------------------------------------------------------------------------------------------------------------------------------------------------------------------------------------------------------------------------------------------------------------------------------------------------------------------------------------------------------------------------------------------------------------------------------------------------------------------------------------------------------------------------------------------------------------------------------------------------------------------------------------------------------------------------------------------------------------------------------------------------------------------------------------------------------------------------------------------------------------------------------------------------------------------------------------------------------------------------------------------------------------------------------------------------------------------------------------------------------------------------------------------------------------------------------------------------------------------------------------------------------------------------------------------------------------------------------------------------------------------------------------------------------------------------------------------------------------------------------------------------------------------------------------------------------------------------------------------|
| Reporting:        |                        |                                                                                                                                                                                                                                                                                                                                                                                                                                                                                                                                                                                                                                                                                                                                                                                                                                                                                                                                                                                                                                                                                                                                                                                                                                                                                                                                                                                                                                                                                                                                                                                                                                                                                                                                                                                                                                                                                                                                                                                                                                                                                                                                                                                                                                                                                                                                                                                                                                                                                                                                                                                                                                                                                                                                                                                                                                                                                                                                                                                                                                                                                                                                                                                                                                                                                                                                                                                                                                                                                                                                                                                                                                                                                                                                                                                                                                                                                                                                                                                                                                                                                                                                                                                                                                                                                                                                                                                                                                                                                                                                                                                                                                                                                                                                                                                                                                                                                                                                                                                                                                                                                                                                                                                                                                                                                                                                                                                                                                                                                                                                                                                                                                                                                                                                                                      |
| Vector competence | 103                    | <p>Arunachalam N, Murty USN, Narahari D, Balasubramanian A, Samuel PP, Thenmozhi V, Paramasivan R, Rajendran R, Tyagi BK, 2009. Longitudinal studies of Japanese encephalitis virus infection in vector mosquitoes in Kurnool district, Andhra Pradesh, south India. <i>J Med Entomol</i> 46: 633–639.</p> <p>Bhattacharyya DR, Dutta P, Khan SA, Doloi P, Goswami BK, 1995. Biting cycles of some potential vector mosquitoes of Japanese encephalitis of Assam, India. <i>Southeast Asian J Trop Med Public Health</i> 26: 177–179.</p> <p>Borah J, Dutta P, Khan SA, Mahanta J, 2013. Epidemiological concordance of Japanese encephalitis virus infection among mosquito vectors, amplifying hosts and humans in India. <i>Epidemiol Infect</i> 141: 74–80.</p> <p>Bryant JE, Crabtree MB, Nam VS, Yen NT, Duc HM, Miller BR, 2005. Isolation of arboviruses from mosquitoes collected in northern Vietnam. <i>Am J Trop Med Hyg</i> 73: 470–473.</p> <p>Buescher EL, Scherer WF, Rosenberg MZ, Gresser I, Hardy JL, Bullock HR, 1959. Ecologic studies of Japanese encephalitis virus in Japan. II. Mosquito infection. <i>Am J Trop Med Hyg</i> 8: 651–664.</p> <p>Burke DS, Tingpalapong M, Ward GS, Andre R, 1985. Intense transmission of Japanese encephalitis virus to pigs in a region free of epidemic encephalitis. <i>Southeast Asian J Trop Med Public Health</i> 16: 199–206.</p> <p>Cates MD, Detels R, 1969. Japanese encephalitis virus in Taiwan: Preliminary evidence for <i>Culex annulus</i> theob. as a vector. <i>J Med Entomol</i> 6: 327–328.</p> <p>Chen BQ, Beaty BJ, 1982. Japanese encephalitis vaccine (2–8 strain) and parent (SA 14 strain) viruses in <i>Culex tritaeniorhynchus</i> mosquitoes. <i>Am J Trop Med Hyg</i> 31: 403–407.</p> <p>Dandawate CN, Rajagopalan PK, Pavri KM, Work TH, 1969. Virus isolations from mosquitoes collected in North Arcot district, Madras state, and Chittoor district, Andhra Pradesh between November 1955 and October 1957. <i>Indian J Med Res</i> 57: 1420–1426.</p> <p>Das BP, Sharma SN, Kabilan L, Lal S, Saxena VK, 2005. First time detection of Japanese encephalitis virus antigen in dry and unpreserved mosquito <i>Culex tritaeniorhynchus</i> Giles, 1901, from Karnal district of Haryana state of India. <i>J Commun Dis</i> 37: 131–133.</p> <p>Dhanda V, Mourya DT, Mishra AC, Ilkal MA, Pant U, Jacob PG, Bhat HR, 1989. Japanese encephalitis virus infection in mosquitoes reared from field-collected immatures and in wild-caught males. <i>Am J Trop Med Hyg</i> 41: 732–736.</p> <p>Dhanda, V, Thenmozhi V, Kumar NP, Hiriyani J, Arunachalam N, Balasubramanian A, Ilango A, Gajanana A, 1997. Virus isolation from wild-caught mosquitoes during a Japanese encephalitis outbreak in Kerala in 1996. <i>Indian J Med Res</i> 106: 4–6.</p> <p>Doi R, Shirasaka A, Sasa M, Oya A, 1977. Studies on the susceptibility of three species of mosquitoes to Japanese encephalitis virus. <i>J Med Entomol</i> 13: 591–594.</p> <p>Doi R, 1970. Studies on the mode of development of Japanese encephalitis virus in some groups of mosquitoes by fluorescent antibody technique. <i>Jpn J Exp Med</i> 40: 101–115.</p> <p>Doi R, Shirasaka A, Sasa M, 1967. The mode of development of Japanese encephalitis virus in the mosquito <i>Culex tritaeniorhynchus summorosus</i> as observed by the fluorescent antibody technique. <i>Jpn J Exp Med</i> 37: 227–238.</p> <p>Feng YSF, Zhang H, Li M, Zhou T, Wang J, Zhang Y, Wang H, Tang Q, Liang G, 2012. Distribution of mosquitoes and mosquito-borne viruses along the China–Myanmar border in Yunnan province. <i>Jpn J Infect Dis</i> 65: 215–221.</p> <p>Fukumi H, Hayashi K, Mifune K, Shichijo A, Matsuo S, Omori N, Wada Y, Oda T, Mogi M, Mori A, 1975. Ecology of Japanese encephalitis virus in Japan. I. Mosquito and pig infection with the virus in relation to human incidences. <i>J Trop Med</i> 17: 97–110.</p> <p>Gajanana A, Rajendran R, Samuel PP, Thenmozhi V, Tsai TF, Kimura-Kuroda J, Reuben R, 1997. Japanese encephalitis in South Arcot district, Tamil Nadu, India, a three-year longitudinal study of vector abundance and infection frequency. <i>J Med Entomol</i> 34: 651–659.</p> <p>Gingrich JB, Nisalak A, Latendresse JR, Sattabongkot J, Hoke CH, Pomsdhit J, Chantalakana C, Satayaphanta C, Uechiewcharnkit K, Innis BL, 1992. Japanese encephalitis virus in Bangkok: factors influencing vector infections in three suburban communities. <i>J Med Entomol</i> 29: 436–444.</p> <p>Gould DJ, Barnett HC, Suyemoto W, 1962. Transmission of Japanese encephalitis virus by <i>Culex gelidus</i> theobald. <i>Trans R Soc Trop Med Hyg</i> 56: 429–435.</p> <p>Gould DJ, Edelman R, Grossman RA, Nisalak A, Sullivan MF, 1973. Study of Japanese encephalitis virus in Chiangmai valley, Thailand. IV. Vector studies. <i>Am J Epidemiol</i> 100: 49–56.</p> <p>Hanna JN, Ritchie SA, Phillips DA, Shield J, Bailey MC, Mackenzie JS, Poidinger M, McCall BJ, Mills PJ, 1996. An outbreak of Japanese encephalitis in the Torres strait, Australia, 1995. <i>Med J Aust</i> 165: 256–260.</p> <p>Hayakawa H, 1988. Experimental study on the transstadial transmission of Japanese encephalitis virus in mosquito larvae. <i>Jpn J Vet Res</i> 36: 149.</p> <p>Hayashi K et al., 1975. Ecology of Japanese encephalitis virus in Japan. III. The results of investigation in Amami island, southern part of Japan, from 1973 to 1975. <i>J Trop Med</i> 17: 129–142.</p> <p>Hsu SH, Huang WC, Cross JH, 1978. The isolation of Japanese encephalitis virus from Taiwan mosquitoes by mosquito cell cultures and mouse inoculation. <i>J Med Entomol</i> 14: 698–701.</p> |

(continued)

SUPPLEMENTAL TABLE 2

Continued

| Number of articles (n) | References                                                                                                                                                                                                                                                                                                             |
|------------------------|------------------------------------------------------------------------------------------------------------------------------------------------------------------------------------------------------------------------------------------------------------------------------------------------------------------------|
|                        | Huang YJS, Harbin JN, Hettenbach SM, Maki E, Cohnstaedt LW, Barrett ADT, Higgs S, Vanlandingham DL, 2015. Susceptibility of a North American <i>Culex quinquefasciatus</i> to Japanese encephalitis virus. <i>Vector Borne Zoonotic Dis</i> 15: 709–711.                                                               |
|                        | Huber K, Jansen S, Leggewie M, Badusche M, Schmidt-Chanasit J, Becker N, Tannich E, Becker SC, 2014. <i>Aedes japonicus japonicus</i> (Diptera: Culicidae) from Germany have vector competence for Japan encephalitis virus but are refractory to infection with West Nile virus. <i>Parasitol Res</i> 113: 3195–3199. |
|                        | Hurlbut HS, 1951. The propagation of Japanese encephalitis virus in the mosquito by parenteral introduction and serial passage. <i>Am J Trop Med Hyg</i> 31: 448–451.                                                                                                                                                  |
|                        | Hurlbut HS, 1950. The transmission of Japanese B encephalitis by mosquitoes after experimental hibernation. <i>Am J Epidemiol</i> 51: 265–268.                                                                                                                                                                         |
|                        | Hurlbut HS, 1964. The pig-mosquito cycle of Japanese encephalitis virus in Taiwan. <i>J Med Entomol</i> , 1: 301–307.                                                                                                                                                                                                  |
|                        | Igarashi A, Sasao F, Wungkobkiat S, Fukai K, 1972. Growth of Japanese encephalitis virus in established lines of mosquito cells. <i>Biken J</i> 16: 17–23.                                                                                                                                                             |
|                        | Johansen CA, van den Hurk AF, Pyke AT, Zborowski P, Phillips DA, Mackenzie JS, Ritchie SA, 2001. Entomological investigations of an outbreak of Japanese encephalitis virus in the Torres strait, Australia, in 1998. <i>J Med Entomol</i> 38: 581–588.                                                                |
|                        | Johansen CA et al., 2000. Isolation of Japanese encephalitis virus from mosquitoes (Diptera: Culicidae) collected in the western province of Papua New Guinea, 1997–1998. <i>Am J Trop Med Hyg</i> 62: 631–638.                                                                                                        |
|                        | Johansen CA, Nisbet DJ, Zborowski P, van den Hurk AF, Ritchie SA, Mackenzie JS, 2003. Flavivirus isolations from mosquitoes collected from western Cape York peninsula, Australia, 1999–2000. <i>J Am Mosq Control Assoc</i> 19: 392–396.                                                                              |
|                        | Johansen CA, Power SL, Broom AK, 2009. Determination of mosquito (Diptera: Culicidae) bloodmeal sources in western Australia: implications for Arbovirus transmission. <i>J Med Entomol</i> 46: 1167–1175.                                                                                                             |
|                        | Johnson PH, Hall-Mendelin S, Whelan PI, Frances SP, Jansen CC, Mackenzie DO, Northill JA, van den Hurk AF, 2009. Vector competence of Australian <i>Culex gelidus</i> theobald (Diptera: Culicidae) for endemic and exotic arboviruses. <i>Aust J Entomol</i> 48: 234–240.                                             |
|                        | Khan AM, Khan AQ, Dobrzynski L, Joshi GP, Myat A, 1981. A Japanese encephalitis focus in Bangladesh. <i>Am J Trop Med Hyg</i> 84: 41–44.                                                                                                                                                                               |
|                        | Kim HC et al., 2011. Japanese encephalitis virus in Culicine mosquitoes (Diptera: Culicidae) collected at Daeseongdong, a village in the demilitarized zone of the Republic of Korea. <i>J Med Entomol</i> 48: 1250–1256.                                                                                              |
|                        | Kim H, Cha GW, Jeong YE, Lee WG, Chang KS, Roh JY, Yang SC, Park MY, Park C, Shin EH, 2015. Detection of Japanese encephalitis virus genotype V in <i>Culex orientalis</i> and <i>Culex pipiens</i> (Diptera: Culicidae) in Korea. <i>PLoS One</i> 10: 1–13.                                                           |
|                        | Konno J, Endo K, Agatsuma H, Ishida N, 1966. Cyclic outbreaks of Japanese encephalitis among pigs and humans. <i>Am J Epidemiol</i> 84: 292–300.                                                                                                                                                                       |
|                        | Kramer LD, Chin P, Cane RP, Kauffman EB, Mackereth G, 2011. Vector competence of New Zealand mosquitoes for selected arboviruses. <i>Am J Trop Med Hyg</i> 85: 182–189.                                                                                                                                                |
|                        | Leake CJ, Johnson RT, 1987. The pathogenesis of Japanese encephalitis virus in <i>Culex tritaeniorhynchus</i> mosquitoes. <i>Trans R Soc Trop Med Hyg</i> 81: 681–685.                                                                                                                                                 |
|                        | Li YX et al., 2011. Japanese encephalitis, Tibet, China. <i>Emerg Infect Dis</i> 17: 934–936.                                                                                                                                                                                                                          |
|                        | Lindahl JF, Stahl K, Chirico J, Boqvist S, Thu HTV, Magnusson U, 2013. Circulation of Japanese encephalitis virus in pigs and mosquito vectors within Can Tho City, Vietnam. <i>PLoS Negl Trop Dis</i> 7: 1–8.                                                                                                         |
|                        | Mackenzie-Impoinvil L, Impoinvil DE, Galbraith SE, Dillon RJ, Ranson H, Johnson N, Fooks AR, Solomon T, Baylis M, 2015. Evaluation of a temperate climate mosquito, <i>Ochlerotatus detritus</i> (= <i>Aedes detritus</i> ), as a potential vector of Japanese encephalitis virus. <i>Med Vet Entomol</i> 29: 1–9.     |
|                        | Mitchell CJ, Savage HM, Smith GC, Flood SP, Castro LT, Roppul M, 1993. Japanese encephalitis on Saipan, a survey of suspected mosquito vectors. <i>Am J Trop Med Hyg</i> 48: 585–590.                                                                                                                                  |
|                        | Mitchell CJ, Chen PS, Boreham PFL, 1973. Host-feeding patterns and behavior of 4 <i>Culex</i> species in an endemic area of Japanese encephalitis. <i>Bull World Health Organ</i> 49: 293–299.                                                                                                                         |
|                        | Mourya DT, Mishra AC, 2000. Antigen distribution pattern of Japanese encephalitis virus in <i>Culex tritaeniorhynchus</i> , <i>C. vishnui</i> & <i>C. pseudovishnui</i> . <i>Indian J Med Res</i> 111: 157–161.                                                                                                        |
|                        | Mourya DT, Ilkal MA, Mishra AC, Jacob PG, Pant U, Ramanujam S, Mavale MS, Bhat HR, Dhanda V, 1989. Isolation of Japanese encephalitis virus from mosquitoes collected in Karnataka state, India from 1985 to 1987. <i>Trans R Soc Trop Med Hyg</i> 83: 550–552.                                                        |
|                        | Muangman D, Edelman R, Sullivan MJ, Gould DJ, 1972. Experimental transmission of Japanese encephalitis virus by <i>Culex fuscocephala</i> . <i>Am J Trop Med Hyg</i> 21: 482–486.                                                                                                                                      |
|                        | Mwandawiro C, Boots M, Tuno N, Suwonkerd W, Tsuda Y, Takagi M, 2000. Heterogeneity in the host preference of Japanese encephalitis vectors in Chiang Mai, northern Thailand. <i>Trans R Soc Trop Med Hyg</i> 94: 238–242.                                                                                              |
|                        | Nicholson J, Ritchie SA, van den Hurk AF, 2014. <i>Aedes albopictus</i> (Diptera: Culicidae) as a potential vector of endemic and exotic arboviruses in Australia. <i>J Med Entomol</i> 51: 661–669.                                                                                                                   |
|                        | Nitatpattana N, Apiwathnasorn C, Barbazan P, Leemingsawat S, Yoksan S, Gonzalez JP, 2005. First isolation of Japanese encephalitis from <i>Culex quinquefasciatus</i> in Thailand. <i>Southeast Asian J Trop Med Public Health</i> 36: 875–878.                                                                        |

(continued)

## SUPPLEMENTAL TABLE 2

## Continued

| Number of articles (n) | References                                                                                                                                                                                                                                                                                            |
|------------------------|-------------------------------------------------------------------------------------------------------------------------------------------------------------------------------------------------------------------------------------------------------------------------------------------------------|
|                        | Olson JG, Ksiazek TG, Lee VH, Tan R, Shope RE, 1985. Isolation of Japanese encephalitis virus from <i>Anopheles annularis</i> and <i>Anopheles vagus</i> in Lombok, Indonesia. <i>Trans R Soc Trop Med Hyg</i> 79: 845–847.                                                                           |
|                        | Pant U, Ilkal MA, Soman RS, Shetty PS, Kanojia PC, Kaul HN, 1994. First isolation of Japanese encephalitis virus from the mosquito <i>Culex tritaeniorhynchus</i> Giles, 1901 (Diptera: Culicidae) in Gorakhpur district, Uttar Pradesh. <i>Indian J Med Res</i> 99: 149–151.                         |
|                        | Peiris JSM, Amerasinghe FP, Amerasinghe PH, Ratnayake CB, Karunaratne SHPP, Tsai TF, 1992. Japanese encephalitis in Sri Lanka—the study of an epidemic, vector incrimination, porcine infection, and human disease. <i>Trans R Soc Trop Med Hyg</i> 86: 307–313.                                      |
|                        | Reeves WC, Hammon WM, 1946. Laboratory transmission of Japanese B encephalitis virus by seven species (three genera) of North American mosquitoes. <i>J Exp Med</i> 83: 185–194.                                                                                                                      |
|                        | Ritchie SA, Phillips D, Broom A, Mackenzie J, Poidinger M, van den Hurk A, 1997. Isolation of Japanese encephalitis from <i>Culex annulirostris</i> in Australia. <i>Am J Trop Med Hyg</i> 56: 80–84.                                                                                                 |
|                        | Rosen L, 1981. The use of <i>Toxorhynchites</i> mosquitoes to detect and propagate dengue and other arboviruses. <i>Am J Trop Med Hyg</i> 30: 177–183.                                                                                                                                                |
|                        | Rosen L, Shroyer DA, Lien JC, 1980. Transovarial transmission of Japanese encephalitis virus by <i>Culex tritaeniorhynchus</i> mosquitoes. <i>Am J Trop Med Hyg</i> 29: 711–712.                                                                                                                      |
|                        | Rosen L, 1988. Further observations on the mechanism of vertical transmission of flaviviruses by <i>Aedes</i> mosquitoes. <i>Am J Trop Med Hyg</i> 39: 123–126.                                                                                                                                       |
|                        | Rosen L, Lien JC, Lu LC, 1989. A longitudinal study of the prevalence of Japanese encephalitis virus in adult and larval <i>Culex tritaeniorhynchus</i> mosquitoes in northern Taiwan. <i>Am J Trop Med Hyg</i> 40: 557–560.                                                                          |
|                        | Rosen L, Shroyer DA, 1985. Comparative susceptibility of five species of <i>Toxorhynchites</i> mosquitoes to parenteral infection with dengue and other flaviviruses. <i>Am J Trop Med Hyg</i> 34: 805–809.                                                                                           |
|                        | Rosen L, Lien JC, Shroyer DA, Baker RH, Lu LC, 1989. Experimental vertical transmission of Japanese encephalitis virus by <i>Culex tritaeniorhynchus</i> and other mosquitoes. <i>Am J Trop Med Hyg</i> 40: 548–556.                                                                                  |
|                        | Rosen L, Roseboom LE, Gubler DJ, Lien JC, Chaniotis BN, 1985. Comparative susceptibility of mosquito species and strains to oral and parenteral infection with dengue and Japanese encephalitis viruses. <i>Am J Trop Med Hyg</i> 34: 603–615.                                                        |
|                        | Rosen L, Tesh RB, Lien JC, Cross JH, 1978. Transovarial transmission of Japanese encephalitis virus by mosquitoes. <i>Science</i> 199: 909–911.                                                                                                                                                       |
|                        | Rosenberg MZ, Scanlon JE, Cedeno R, Buescher EL, 1953. Experimental transmission of Japanese B encephalitis virus from bird to bird by mosquitoes (preliminary report). <i>Medical Bulletin US</i> 1: 113–115.                                                                                        |
|                        | Samuel PP, Hiriyan J, Thenmozhi V, Balasubramanian A, 1998. A system for studying vector competence of mosquitoes for Japanese encephalitis virus. <i>Indian J Malariol</i> 35: 146–150.                                                                                                              |
|                        | Samuel PP, Arunachalam N, Hiriyan J, Tyagi BK, 2008. Host feeding pattern of Japanese encephalitis virus vector mosquitoes (Diptera: Culicidae) from Kuttanadu, Kerala, India. <i>J Med Entomol</i> 45: 927–932.                                                                                      |
|                        | Seo HJ, Kim HC, Klein TA, Ramey AM, Lee JH, Kyung SG, Park JY, Cho YS, Cho IS, Yeh JY, 2013. Molecular detection and genotyping of Japanese encephalitis virus in mosquitoes during a 2010 outbreak in the Republic of Korea. <i>PLoS One</i> 8: 1–11.                                                |
|                        | Somboon P, Rattanachanpichai E, Choochote W, Khamboonruang C, Keha P, Suwanphanit P, Sukontasan K, 1989. Mosquito vectors of Japanese encephalitis in Muang district, Chiang Mai province: nocturnal activity, host preference and resting behavior. <i>Chiang Mai Medicine Bulletin</i> 28: 167–175. |
|                        | Su, C-L, C-F Yang, H-J Teng, L-C Lu, C Lin, K-H Tsai, Y-Y Chen, L-Y Chen, S-F Chang, P-Y Shu, 2014. Molecular epidemiology of Japanese encephalitis virus in mosquitoes in Taiwan during 2005–2012. <i>PLoS Negl Trop Dis</i> 8: 1–13.                                                                |
|                        | Sudeep AB, Ghodke YS, George RP, Ingale VS, Dhaigude SD, Gokhale MD, 2015. Vectorial capacity of <i>Culex gelidus</i> (Theobald) mosquitoes to certain viruses of public health importance in India. <i>J Vector Borne Dis</i> 52: 153–158.                                                           |
|                        | Sun X et al., 2009. Distribution of arboviruses and mosquitoes in Northwestern Yunnan province, China. <i>Vector Borne Zoonotic Dis</i> 9: 623–630.                                                                                                                                                   |
|                        | Takahashi M, 1976. The effects of environmental and physiological conditions of <i>Culex tritaeniorhynchus</i> on the pattern of transmission of Japanese encephalitis virus. <i>J Med Entomol</i> 13: 275–284.                                                                                       |
|                        | Takahashi M, 1982. Differential transmission efficiency for Japanese encephalitis virus among colonized strains of <i>Culex tritaeniorhynchus</i> . <i>Jap J Sanit Zool</i> 33: 325–333.                                                                                                              |
|                        | Takashima I, Rosen L, 1989. Horizontal and vertical transmission of Japanese encephalitis virus by <i>Aedes japonicus</i> (Diptera: Culicidae). <i>J Med Entomol</i> 26: 454–458.                                                                                                                     |
|                        | Takashima I, Hashimoto N, Watanabe T, Rosen L, 1989. Mosquito collection in endemic areas of Japanese encephalitis in Hokkaido, Japan. <i>Nihon Juigaku Zasshi</i> 51: 947–953.                                                                                                                       |
|                        | Tan R, Nalim S, Suwasono H, Jennings GB, 1993. Japanese encephalitis virus isolated from seven species of mosquitoes collected at Semarang regency, Central Java. <i>Buletin Penelitian Kesehatan</i> 21: 1–5.                                                                                        |
|                        | Tewari SC, Thenmozhi V, Arunachalam N, Samuel PP, Tyagi BK, 2008. Desiccated vector mosquitoes used for the surveillance of Japanese encephalitis virus activity in endemic southern India. <i>Trop Med Int Health</i> 13: 286–290.                                                                   |

(continued)

## SUPPLEMENTAL TABLE 2

Continued

| Number of articles (n) | References                                                                                                                                                                                                                                                                                                                  |                                                                                                                                                                                                                 |
|------------------------|-----------------------------------------------------------------------------------------------------------------------------------------------------------------------------------------------------------------------------------------------------------------------------------------------------------------------------|-----------------------------------------------------------------------------------------------------------------------------------------------------------------------------------------------------------------|
|                        | Thenmozhi V, Rajendran R, Ayanar K, Manavalan R, Tyagi BK, 2006. Long-term study of Japanese encephalitis virus infection in <i>Anopheles subpictus</i> in Cuddalore district, Tamil Nadu, south India. <i>Trop Med Int Health</i> 11: 288–293.                                                                             |                                                                                                                                                                                                                 |
|                        | Tiawsirisup S, Junpee A, Nuchprayoon S, 2012. Mosquito distribution and Japanese encephalitis virus infection in a bat cave and its surrounding area in Lopburi province, central Thailand. <i>Thai J Vet Med</i> 42: 43–49.                                                                                                |                                                                                                                                                                                                                 |
|                        | Tiawsirisup S, Nuchprayoon S, 2010. Mosquito distribution and Japanese encephalitis virus infection in the immigration bird (Asian open-billed stork) nested area in Pathum Thani province, central Thailand. <i>Parasitol Res</i> 106: 907–910.                                                                            |                                                                                                                                                                                                                 |
|                        | Turell MJ, Mores CN, Dohm DJ, Komilov N, Paragas J, Lee JS, Shermuhemedova D, Endy TP, Kodirov A, Khodjaev S, 2006. Laboratory transmission of Japanese encephalitis and West Nile viruses by molestus form of <i>Culex pipiens</i> (Diptera: Culicidae) collected in Uzbekistan in 2004. <i>J Med Entomol</i> 43: 296–300. |                                                                                                                                                                                                                 |
|                        | Turell MJ, Mores CN, Dohm DJ, Lee WJ, Kim HC, Klein TA, 2006. Laboratory transmission of Japanese encephalitis, West Nile, and Getah viruses by mosquitoes (Diptera: Culicidae) collected near Camp Greaves, Gyeonggi province, Republic of Korea, 2003. <i>J Med Entomol</i> 43: 1076–1081.                                |                                                                                                                                                                                                                 |
|                        | Turell MJ et al., 2003. Isolation of Japanese encephalitis and Getah viruses from mosquitoes (Diptera: Culicidae) collected near Camp Greaves, Gyonggi province, Republic of Korea, 2000. <i>J Med Entomol</i> 40: 580–584.                                                                                                 |                                                                                                                                                                                                                 |
|                        | Upadhyayula SM, Mutheneni SR, Nayanoori HK, Natarajan A, Goswami P, 2012. Impact of weather variables on mosquitoes infected with Japanese encephalitis virus in Kurnool district, Andhra Pradesh. <i>Asian Pac J Trop Dis</i> 5: 337–341.                                                                                  |                                                                                                                                                                                                                 |
|                        | van den Hurk AF, Montgomery BL, Northill JA, Smith IL, Zborowski P, Ritchie SA, Mackenzie JS, Smith GA, 2006. The first isolation of Japanese encephalitis virus from mosquitoes collected from mainland Australia. <i>Am J Trop Med Hyg</i> 75: 21–25.                                                                     |                                                                                                                                                                                                                 |
|                        | van den Hurk AF, Johansen CA, Zborowski P, Phillips DA, Pyke AT, Mackenzie JS, Ritchie SA, 2001. Flaviviruses isolated from mosquitoes collected during the first recorder outbreak of Japanese encephalitis virus on Cape York peninsula, Australia. <i>Am J Trop Med Hyg</i> 64: 125–130.                                 |                                                                                                                                                                                                                 |
|                        | van den Hurk AF, Johansen CA, Zborowski P, Paru R, Foley PN, Beebe NW, Mackenzie JS, Ritchie SA, 2003. Mosquito host-feeding patterns and implications for Japanese encephalitis virus transmission in northern Australia and Papua New Guinea. <i>Med Vet Entomol</i> 17: 403–411.                                         |                                                                                                                                                                                                                 |
|                        | van den Hurk AF, Nisbet DJ, Hall RA, Kay BH, Mackenzie JS, Ritchie SA, 2003. Vector competence of Australian mosquitoes (Diptera: Culicidae) for Japanese encephalitis virus. <i>J Med Entomol</i> 40: 82–90.                                                                                                               |                                                                                                                                                                                                                 |
|                        | van den Hurk AF, Johnson PH, Hall-Mendelin S, Northill JA, Simmons RJ, Jansen CC, Frances SP, Smith GA, Ritchie SA, 2007. Expectoration of flaviviruses during sugar feeding by mosquitoes (Diptera: Culicidae). <i>J Med Entomol</i> 44: 845–850.                                                                          |                                                                                                                                                                                                                 |
|                        | van Peenen PFD, Joseph PL, 1975. Isolation of Japanese encephalitis virus from mosquitoes near Bogor, West Java, Indonesia. <i>J Med Entomol</i> 12: 573–574.                                                                                                                                                               |                                                                                                                                                                                                                 |
|                        | Victor TJ, Malathi M, Ravi V, Palani G, Appavoo NC, 2000. First outbreak of Japanese encephalitis in two villages of Dharmapuri district in Tamil Nadu. <i>Indian J Med Res</i> 112: 193–197.                                                                                                                               |                                                                                                                                                                                                                 |
|                        | Vythilingam I, Oda K, Mahadevan S, Abdullah G, Thim CS, Hong CC, Vijayamalar B, Sinniah M, Igarashi A, 1997. Abundance, parity, and Japanese encephalitis virus infection of mosquitoes (Diptera: Culicidae) in Sepang district, Malaysia. <i>J Med Entomol</i> 34: 257–262.                                                |                                                                                                                                                                                                                 |
|                        | Vythilingam I, Tan SB, Krishnasamy M, 2002. Susceptibility of <i>Culex sitiens</i> to Japanese encephalitis virus in peninsular Malaysia. <i>Trop Med Int Health</i> 7: 539–540.                                                                                                                                            |                                                                                                                                                                                                                 |
|                        | Wada Y, Oda T, Mogi M, Mori A, Omori N, Fukumi H, Hayashi K, Mifune K, Shichijo A, Matsuo S, 1975. Ecology of Japanese encephalitis virus in Japan. II. The population of vector mosquitoes and the epidemic of Japanese encephalitis. <i>J Trop Med</i> 17: 111–127.                                                       |                                                                                                                                                                                                                 |
|                        | Wang L, 1975. Host preference of mosquito vectors of Japanese encephalitis. <i>Chinese Journal of Microbiology</i> 8: 274–279.                                                                                                                                                                                              |                                                                                                                                                                                                                 |
|                        | Weng MH, Lien JC, Ji DD, 2005. Monitoring of Japanese encephalitis virus infection in mosquitoes (Diptera: Culicidae) at Guandu Nature Park, Taipei, 2002–2004. <i>J Med Entomol</i> 42: 1085–1088.                                                                                                                         |                                                                                                                                                                                                                 |
|                        | Weng MH, Lien JC, Lin CC, Yao CW, 2000. Vector competence of <i>Culex pipiens molestus</i> (Diptera: Culicidae) from Taiwan for a sympatric strain of Japanese encephalitis virus. <i>J Med Entomol</i> 37: 780–783.                                                                                                        |                                                                                                                                                                                                                 |
|                        | Weng MH, Lien JC, Wang YM, Wu HL, Chin C, 1997. Susceptibility of three laboratory strains of <i>Aedes albopictus</i> (Diptera: Culicidae) to Japanese encephalitis virus from Taiwan. <i>J Med Entomol</i> 34: 745–747.                                                                                                    |                                                                                                                                                                                                                 |
|                        | Weng MH, Lien JC, Wang YM, Lin CC, Lin HC, Chin C, 1999. Isolation of Japanese encephalitis virus from mosquitoes collected in northern Taiwan between 1995 and 1996. <i>J Microbiol Immunol Infect</i> 32: 9–13.                                                                                                           |                                                                                                                                                                                                                 |
|                        | Yamamoto N, Kimura T, Ohyama A, 1987. Multiplication and distribution of type 2 dengue and Japanese encephalitis viruses in <i>Toxorhynchites splendens</i> after intrathoracic inoculation. <i>Arch Virol</i> 97: 37–47.                                                                                                   |                                                                                                                                                                                                                 |
| Host competence        | 50                                                                                                                                                                                                                                                                                                                          | Banerjee K, Ilkal MA, Deshmukh PK, 1984. Susceptibility of <i>Cynopterus sphinx</i> (frugivorous bat) and <i>Suncus murinus</i> (house shrew) to Japanese encephalitis virus. <i>Indian J Med Res</i> 79: 8–12. |
|                        |                                                                                                                                                                                                                                                                                                                             | Benenson MW, Franklin HT Jr, Gresso W, Ames CW, Altstatt LB, 1975. The virulence to man of Japanese encephalitis virus in Thailand. <i>Am J Trop Med Hyg</i> 24: 974–980.                                       |

(continued)

## SUPPLEMENTAL TABLE 2

Continued

| Number of articles (n) | References                                                                                                                                                                                                                                                                                              |
|------------------------|---------------------------------------------------------------------------------------------------------------------------------------------------------------------------------------------------------------------------------------------------------------------------------------------------------|
|                        | Bosco-Lauth A, Mason G, Bowen R, 2011. Pathogenesis of Japanese encephalitis virus infection in a golden hamster model and evaluation of flavivirus cross-protective immunity. <i>Am J Trop Med Hyg</i> 84: 727–732.                                                                                    |
|                        | Boyle DB, Dickerman RW, Marshall ID, 1983. Primary viraemia responses of herons to experimental infection with Murray Valley encephalitis, Kunjin and Japanese encephalitis viruses. <i>Aust J Exp Biol Med Sci</i> 61: 655–664.                                                                        |
|                        | Buescher EL, Scherer WF, McClure HE, Moyer JT, Rosenberg MZ, Yoshii M, Okada Y, 1959. Ecologic studies of Japanese encephalitis virus in Japan. IV. Avian infection. <i>Am J Trop Med Hyg</i> 8: 678–688.                                                                                               |
|                        | Buescher EL, Scherer WF, Rosenberg MZ, Kutner LJ, McClure HE, 1959. Immunologic studies of Japanese encephalitis virus in Japan. IV. Maternal antibody in birds. <i>J Immunol</i> 83: 614–619.                                                                                                          |
|                        | Cha GW, Lee EJ, Lim EJ, Sin KS, Park WW, Jeon DY, Han MG, Lee WJ, Choi WY, Jeong YE, 2015. A novel immunochromatographic test applied to a serological survey of Japanese encephalitis virus on pig farms in Korea. <i>PLoS One</i> 10: 1–12.                                                           |
|                        | Chanyasanha C, Hongsrithong P, Sujirarat D, Urairong K, 2011. Seasonal effect and host effect associated with positive hemagglutination inhibition (HI) antibody on Japanese encephalitis (JE) in swine sera. <i>Asia J Public Health</i> 2: 3–8.                                                       |
|                        | Dhanda V, Banerjee K, Deshmukh PK, Ilkal MA, 1977. Experimental viraemia and transmission of Japanese encephalitis virus by mosquitoes in domestic ducks. <i>Indian J Med Res</i> 66: 881–888.                                                                                                          |
|                        | Gresser I, Hardy JL, Hu SMK, Scherer WF, 1958. Factors influencing transmission of Japanese B encephalitis virus by a colonized strain of <i>Culex tritaeniorhynchus</i> Giles, from infected pigs and chicks to susceptible pigs and birds. <i>Am J Trop Med Hyg</i> 7: 365–373.                       |
|                        | Hammon WM, Tigertt WD, Sather GE, Berge TO, Meiklejohn G, 1958. Epidemiologic studies of concurrent “virgin” epidemics of Japanese B encephalitis and mumps on Guam, 1947–1948, with subsequent observations including dengue, through 1957. <i>Am J Trop Med Hyg</i> 7: 441–467.                       |
|                        | Hanna JN, Ritchie SA, Phillips DA, Lee JM, Hills SL, van den Hurk AF, Pyke AT, Johansen CA, Mackenzie JS, 1999. Japanese encephalitis in North Queensland, Australia, 1998. <i>Med J Aust</i> 170: 533–536.                                                                                             |
|                        | Hasegawa M, Tuno N, Yen NT, Nam VS, Takagi M, 2008. Influence of the distribution of host species on adult abundance of Japanese encephalitis vectors— <i>Culex vishnui</i> subgroup and <i>Culex gelidus</i> —in a rice-cultivating village in northern Vietnam. <i>Am J Trop Med Hyg</i> 78: 159–168. |
|                        | Ilkal MA, Dhanda V, Rao BU, George S, Mishra AC, Prasanna Y, Gopalkrishna S, Pavri KM, 1988. Absence of viraemia in cattle after experimental infection with Japanese encephalitis virus. <i>Trans R Soc Trop Med Hyg</i> 82: 628–631.                                                                  |
|                        | Ilkal MA, Prasanna Y, Jacob PG, Geevarghese G, Banerjee K, 1994. Experimental studies on the susceptibility of domestic pigs to West Nile virus followed by Japanese encephalitis virus infection and vice versa. <i>Acta Virol</i> 38: 157–161.                                                        |
|                        | Johnsen DO, Edelman R, Grossman RA, Muangman D, Pomsdhit J, Gould DJ, 1974. Study of Japanese encephalitis virus in Chiangmai valley, Thailand. V. Animal infections. <i>Am J Epidemiol</i> 100: 57–68.                                                                                                 |
|                        | Khan FU, Banerjee K, 1980. Mosquito collection in heronries and antibodies to Japanese encephalitis virus in birds in Asansol-Dhanbad region. <i>Indian J Med Res</i> 71: 1–5.                                                                                                                          |
|                        | Kodama K, Sasaki N, Inoue YK, 1968. Studies of live attenuated Japanese encephalitis vaccine in swine. <i>J Immunol</i> 100: 194–200.                                                                                                                                                                   |
|                        | Konishi E, Kitai Y, Tabei Y, Nishimura K, Harada S, 2010. Natural Japanese encephalitis virus infection among humans in west and east Japan shows the need to continue a vaccination program. <i>Vaccine</i> 28: 2664–2670.                                                                             |
|                        | Kumari R, Kumar K, Rawat A, Singh G, Yadav NK, Chauhan LS, 2013. First indigenous transmission of Japanese encephalitis in urban areas of national capital territory of Delhi, India. <i>Trop Med Int Health</i> 18: 743–749.                                                                           |
|                        | Liu H, Lu HJ, Liu ZJ, Jing J, Ren JQ, Liu YY, Lu F, Jin NY, 2013. Japanese encephalitis virus in mosquitoes and swine in Yunnan province, China 2009–2010. <i>Vector Borne Zoonotic Dis</i> 13: 41–49.                                                                                                  |
|                        | Mani TR, Rao CVRM, Rajendran R, Devaputra M, Prasanna Y, Hanumaiah, Gajanana A, Reuben R, 1991. Surveillance for Japanese encephalitis in villages near Madurai, Tamil Nadu, India. <i>Trans R Soc Trop Med Hyg</i> 85: 287–291.                                                                        |
|                        | Morris JA, O'Connor JR, Smadel JE, 1955. Infection and immunity patterns in monkeys injected with viruses of Russian Spring-Summer and Japanese encephalitis. <i>Am J Hyg</i> 62: 327–341.                                                                                                              |
|                        | Nathanson N, Cole GA, 1970. Fatal Japanese encephalitis virus infection in immunosuppressed spider monkeys. <i>J Clin Exp Immunol</i> 6: 161–166.                                                                                                                                                       |
|                        | Nemeth NM, Bosco-Lauth AM, Sciulli RH, Gose RB, Nagata MT, Bowen RA, 2010. Serosurveillance for Japanese encephalitis and West Nile viruses in resident birds in Hawaii. <i>J Wildl Dis</i> 46: 659–664.                                                                                                |
|                        | Nemeth N, Bosco-Lauth A, Oesterle P, Kohler D, Bowen R, 2012. North American birds as potential amplifying hosts of Japanese encephalitis virus. <i>Am J Trop Med Hyg</i> 87: 760–767.                                                                                                                  |
|                        | Nga PT, Phuong LK, Nam VS, Yen NT, Tien TV, Lien HP, 1995. Transmission of Japanese encephalitis (JE) in Gia Luong District, Ha Bac Province, Vietnam after JE vaccination, 1993–1994. <i>J Trop Med</i> 37: 129–134.                                                                                   |

(continued)

SUPPLEMENTAL TABLE 2

Continued

| Number of articles (n) | References                                                                                                                                                                                                                                                                                                                                                                                                                                                                                                                                                                                                                                                                                                                                                                                                                                                                                                                                                                                                                                                                                                                                                                                                                                                                                                                                                                                                                                                                                                                                                                                                                                                                                                                                                                                                                                                                                                                                                                                                                                                                                                                                                                                                                                                                                                                                                                                                                                                                                                                                                                                                                                                                                                                                                                                                                                                                                                                                                                                                                                                                                                                                                                                                                                                                                                                                                                                                                                                                                                                                                                                                                                                                                                                                                                                                                                                                                                                                                                                                                                                                                                                                                                                                                                                                                                                                                                                                                                                                                                                                                                                                                                                                                                                                                                                                                                                                                                                                                                                                                                                                                                                                                                                                                                                                                                                                                                                                    |                                                                                                                                                                                                                                                                                                                                                                                                                                                                                                                                                                                                                                                                                                                           |
|------------------------|---------------------------------------------------------------------------------------------------------------------------------------------------------------------------------------------------------------------------------------------------------------------------------------------------------------------------------------------------------------------------------------------------------------------------------------------------------------------------------------------------------------------------------------------------------------------------------------------------------------------------------------------------------------------------------------------------------------------------------------------------------------------------------------------------------------------------------------------------------------------------------------------------------------------------------------------------------------------------------------------------------------------------------------------------------------------------------------------------------------------------------------------------------------------------------------------------------------------------------------------------------------------------------------------------------------------------------------------------------------------------------------------------------------------------------------------------------------------------------------------------------------------------------------------------------------------------------------------------------------------------------------------------------------------------------------------------------------------------------------------------------------------------------------------------------------------------------------------------------------------------------------------------------------------------------------------------------------------------------------------------------------------------------------------------------------------------------------------------------------------------------------------------------------------------------------------------------------------------------------------------------------------------------------------------------------------------------------------------------------------------------------------------------------------------------------------------------------------------------------------------------------------------------------------------------------------------------------------------------------------------------------------------------------------------------------------------------------------------------------------------------------------------------------------------------------------------------------------------------------------------------------------------------------------------------------------------------------------------------------------------------------------------------------------------------------------------------------------------------------------------------------------------------------------------------------------------------------------------------------------------------------------------------------------------------------------------------------------------------------------------------------------------------------------------------------------------------------------------------------------------------------------------------------------------------------------------------------------------------------------------------------------------------------------------------------------------------------------------------------------------------------------------------------------------------------------------------------------------------------------------------------------------------------------------------------------------------------------------------------------------------------------------------------------------------------------------------------------------------------------------------------------------------------------------------------------------------------------------------------------------------------------------------------------------------------------------------------------------------------------------------------------------------------------------------------------------------------------------------------------------------------------------------------------------------------------------------------------------------------------------------------------------------------------------------------------------------------------------------------------------------------------------------------------------------------------------------------------------------------------------------------------------------------------------------------------------------------------------------------------------------------------------------------------------------------------------------------------------------------------------------------------------------------------------------------------------------------------------------------------------------------------------------------------------------------------------------------------------------------------------------------------------------------|---------------------------------------------------------------------------------------------------------------------------------------------------------------------------------------------------------------------------------------------------------------------------------------------------------------------------------------------------------------------------------------------------------------------------------------------------------------------------------------------------------------------------------------------------------------------------------------------------------------------------------------------------------------------------------------------------------------------------|
|                        | <p>Nitatpattana N, Le Flohic G, Thongchai P, Nakgoi K, Palaboodeewat S, Khin M, Barbazan P, Yoksan S, Gonzalez JP, 2011. Elevated Japanese encephalitis virus activity monitored by domestic sentinel piglets in Thailand. <i>Vector Borne Zoonotic Dis</i> 11: 391–394.</p> <p>Ohno Y, Sato H, Suzuki K, Yokoyama M, Uni S, Shibasaki T, Sashika M, Inokuma H, Kai K, Maeda K, 2009. Detection of antibodies against Japanese encephalitis virus in raccoons, raccoon dogs and wild boars in Japan. <i>J Vet Med Sci</i> 71: 1035–1039.</p> <p>Oya A, Doi R, Shirasaka A, Yabe S, Sasa M, 1983. Studies of Japanese encephalitis virus infection of reptiles. I. Experimental infection of snakes and lizards. <i>Jpn J Exp Med</i> 53: 117–123.</p> <p>Paul WS, Moore PS, Karabatsos N, Flood SP, Yamada S, Jackson T, Tsai TF, 1993. Outbreak of Japanese encephalitis on the Island of Saipan, 1990. <i>J Infect Dis</i> 167: 1053–1058.</p> <p>Peiris JSM, Amerasinghe FP, Arunagiri CK, Perera LP, Karunaratne SHPP, Ratnayake CB, Kulatilaka TA, Abeysinghe MRN, 1993. Japanese encephalitis in Sri Lanka: comparison of vector and virus ecology in different agro-climatic areas. <i>Trans R Soc Trop Med Hyg</i> 87: 541–548.</p> <p>Pennington NE, Phelps CA, 1968. Identification of the host range of <i>Culex tritaeniorhynchus</i> mosquitoes on Okinawa, Ryukyu islands. <i>J Med Entomol</i> 5: 483–487.</p> <p>Ricklin ME, García-Nicolás O, Brechbühl D, Python S, Zumkehr B, Nougaiere A, Charrel RN, Posthaus H, Oevermann A, Summerfield A, 2016. Vector-free transmission and persistence of Japanese encephalitis virus in pigs. <i>Nat Commun</i> 7: 1–9.</p> <p>Rodrigues FM, Guttikar SN, Pinto BD, 1981. Prevalence of antibodies to Japanese encephalitis and West Nile viruses among wild birds in the Krishna-Godavari Delta, Andhra Pradesh, India. <i>Trans R Soc Trop Med Hyg</i> 75: 258–262.</p> <p>Sasaki O, Karoji Y, Kuroda A, Karaki T, Takenokuma K, Maeda O, 1982. Protection of pigs against mosquito-borne Japanese encephalitis virus by immunization with a live attenuated vaccine. <i>Antiviral Res</i> 2: 355–360.</p> <p>Scherer WF, Smith RPJ, 1960. In vitro studies on the sites of Japanese encephalitis virus multiplication in the heron, an important natural host in Japan. <i>Am J Trop Med Hyg</i> 9: 50–55.</p> <p>Scherer WF, Buescher EL, McClure HE, 1959. Ecologic studies of Japanese encephalitis virus in Japan. V. Avian factors. <i>Am J Trop Med Hyg</i> 8: 689–697.</p> <p>Scherer WF, Moyer JT, Izumi T, Gresser I, McCown J, 1959. Ecologic studies of Japanese encephalitis virus in Japan. VI. Swine infection. <i>Am J Trop Med Hyg</i> 8: 698–706.</p> <p>See E, Tan HC, Wang D, Ooi EE, Lee MA, 2002. Presence of hemagglutination inhibition and neutralization antibodies to Japanese encephalitis virus in wild pigs on an offshore island in Singapore. <i>Acta Trop</i> 81: 233–236.</p> <p>Self LS, Shin HK, Kim KH, Lee KW, Chow CY, Hong HK, 1973. Ecological studies on <i>Culex tritaeniorhynchus</i> as a vector of Japanese encephalitis. <i>Bull World Health Organ</i> 49: 41–47.</p> <p>Simpson DIH et al., 1976. Arbovirus infections in Sarawak, the role of the domestic pig. <i>Trans R Soc Trop Med Hyg</i> 70: 66–72.</p> <p>Soman RS, Rodrigues FM, Guttikar SN, Guru PY, 1977. Experimental viraemia and transmission of Japanese encephalitis virus by mosquitoes in ardeid birds. <i>Indian J Med Res</i> 66: 709–718.</p> <p>Sulkin SE, Allen R, Sims R, 1966. Studies of arthropod-borne virus infections in Chiroptera. III. Influence of environmental temperature on experimental infections with Japanese B and St. Louis encephalitis viruses. <i>Am J Trop Med Hyg</i> 15: 406–417.</p> <p>Sulkin SE, Sims R, Allen R, 1964. Studies of arthropod-borne virus infections in Chiroptera. II. Experiments with Japanese B and St. Louis encephalitis viruses in the gravid bat. Evidence of transplacental transmission. <i>Am J Trop Med Hyg</i> 13: 475–481.</p> <p>Tadano M, Kanemura K, Hasegawa H, Makino Y, Fukunaga T, 1994. Epidemiological and ecological studies of Japanese encephalitis in Okinawa, subtropical area in Japan. I. Investigations on antibody levels to Japanese encephalitis virus in swine sera and vector mosquito in Okinawa, Miyako and Ishigaki islands. <i>Microbiol Immunol</i> 38: 117–122.</p> <p>Takashima I, Watanabe T, Ouchi N, Hashimoto N, 1988. Ecological studies of Japanese encephalitis virus in Hokkaido: interepidemic outbreaks of swine abortion and evidence for the virus to overwinter locally. <i>Am J Trop Med Hyg</i> 38: 420–427.</p> <p>Thakur KK, Pant GR, Wang L, Hill CA, Pogranichniy RM, Manandhar S, Johnson AJ, 2012. Seroprevalence of Japanese encephalitis virus and risk factors associated with seropositivity in pigs in four mountain districts in Nepal. <i>Zoonoses Public Health</i> 59: 393–400.</p> <p>Thein S, Aung H, Sebastian AA, 1988. Study of vector, amplifier, and human infection with Japanese encephalitis virus in a Rangoon community. <i>Am J Epidemiol</i> 128: 1376–1382.</p> <p>Ura M, 1976. Ecology of Japanese encephalitis virus in Okinawa, Japan. I. The investigation on pig and mosquito infection of the virus in Okinawa island from 1966 to 1976. <i>J Trop Med</i> 18: 151–163.</p> |                                                                                                                                                                                                                                                                                                                                                                                                                                                                                                                                                                                                                                                                                                                           |
| More than one category | 18                                                                                                                                                                                                                                                                                                                                                                                                                                                                                                                                                                                                                                                                                                                                                                                                                                                                                                                                                                                                                                                                                                                                                                                                                                                                                                                                                                                                                                                                                                                                                                                                                                                                                                                                                                                                                                                                                                                                                                                                                                                                                                                                                                                                                                                                                                                                                                                                                                                                                                                                                                                                                                                                                                                                                                                                                                                                                                                                                                                                                                                                                                                                                                                                                                                                                                                                                                                                                                                                                                                                                                                                                                                                                                                                                                                                                                                                                                                                                                                                                                                                                                                                                                                                                                                                                                                                                                                                                                                                                                                                                                                                                                                                                                                                                                                                                                                                                                                                                                                                                                                                                                                                                                                                                                                                                                                                                                                                            | <p>Arunachalam N, Samuel PP, Hiriyan J, Rajendran R, Dash AP, 2005. Observations on the multiple feeding behavior of <i>Culex tritaeniorhynchus</i> (Diptera: Culicidae), the vector of Japanese encephalitis in Kerala in southern India. <i>Am J Trop Med Hyg</i> 72: 198–200.</p> <p>Buescher EL, Scherer WF, Rosenberg MZ, McClure HE, 1959. Immunologic studies of Japanese encephalitis virus in Japan. III. Infection and antibody responses of birds. <i>J Immunol</i> 83: 605–613.</p> <p>Chakravarty SK, Sarkar JK, Chakravarty MS, Mukherjee MK, Mukherjee KK, Das BC, Hati AK, 1975. The first epidemic of Japanese encephalitis studied in India—virological studies. <i>Indian J Med Res</i> 63: 77–82.</p> |

(continued)

## SUPPLEMENTAL TABLE 2

## Continued

| Number of articles (n) | References                                                                                                                                                                                                                                                                                                                                                            |
|------------------------|-----------------------------------------------------------------------------------------------------------------------------------------------------------------------------------------------------------------------------------------------------------------------------------------------------------------------------------------------------------------------|
|                        | Chen WJ, Dong CF, Chiou LY, Chuang WL, 2000. Potential role of <i>Armigeres subalbatus</i> (Diptera: Culicidae) in the transmission of Japanese encephalitis virus in the absence of rice culture on Liu-Chiu Islet, Taiwan. <i>J Med Entomol</i> 37: 108–113.                                                                                                        |
|                        | Do LP, Bui TM, Phan NT, 2016. Mechanism of Japanese encephalitis virus genotypes replacement based on human, porcine and mosquito-originated cell lines model. <i>Asian Pac J Trop Dis</i> 9: 333–336.                                                                                                                                                                |
|                        | Doi R, Oya A, Shirasaka A, Yabe S, Sasa M, 1983. Studies of Japanese encephalitis virus infection of reptiles. II. Role of lizards on hibernation of Japanese encephalitis virus. <i>Jpn J Exp Med</i> 53: 125–134.                                                                                                                                                   |
|                        | Gould DJ, Byrne RJ, Hayes DE, 1964. Experimental infection of horses with Japanese encephalitis virus by mosquito bite. <i>Am J Trop Med Hyg</i> 13: 742–746.                                                                                                                                                                                                         |
|                        | Hall-Mendelin S, Jansen CC, Cheah WY, Montgomery BL, Hall RA, Ritchie SA, van den Hurk AF, 2012. <i>Culex annulirostris</i> (Diptera: Culicidae) host feeding patterns and Japanese encephalitis virus ecology in Northern Australia. <i>J Med Entomol</i> 49: 371–377.                                                                                               |
|                        | Khan SA, Narain K, Dutta P, Handique R, Srivastava VK, Mahanta J, 1997. Biting behavior and biting rhythm of potential Japanese encephalitis vectors in Assam. <i>J Commun Dis</i> 29: 109–120.                                                                                                                                                                       |
|                        | Okuno T, Mitchell CJ, Chen PS, Wang JS, Lin SY, 1973. Seasonal infection of <i>Culex</i> mosquitos and swine with Japanese encephalitis virus. <i>Bull World Health Organ</i> 49: 347–352.                                                                                                                                                                            |
|                        | Reuben R, Thenmozhi V, Samuel PP, Gajanana A, Mani TR, 1992. Mosquito blood feeding patterns as a factor in the epidemiology of Japanese encephalitis in southern india. <i>Am J Trop Med Hyg</i> 46: 664–663.                                                                                                                                                        |
|                        | Sabin AB, 1947. Epidemic encephalitis in military personnel. <i>JAMA</i> 133: 281–293.                                                                                                                                                                                                                                                                                |
|                        | Saito M, Nakata K, Nishijima T, Yamashita K, Saito A, Ogura G, 2009. Proposal for Japanese encephalitis surveillance using captured invasive mongooses under an eradication project on Okinawa island, Japan. <i>Vector Borne Zoonotic Dis</i> 9: 259–266.                                                                                                            |
|                        | Scherer WF, Moyer JT, Izumi T, 1959. Immunologic studies of Japanese encephalitis virus in Japan. V. Maternal antibodies, antibody responses and viremia following infection of swine. <i>J Immunol</i> 83: 620–626.                                                                                                                                                  |
|                        | van den Hurk AF, Smith CSS, Field HE, Smith IL, Northill JA, Taylor CT, Jansen CC, Smith GA, Mackenzie JS, 2009. Transmission of Japanese encephalitis virus from the black flying fox, <i>Pteropus alecto</i> , to <i>Culex annulirostris</i> mosquitoes, despite the absence of detectable viremia. <i>Am J Trop Med Hyg</i> 81: 457–462.                           |
|                        | van den Hurk AF, Nisbet DJ, Johansen CA, Foley PN, Ritchie SA, Mackenzie JA, 2001. Japanese encephalitis on Badu island, Australia: the first isolation of Japanese encephalitis virus from <i>Culex gelidus</i> in the Australasian region and the role of mosquito host-feeding patterns in virus transmission cycles. <i>Trans R Soc Trop Med Hyg</i> 95: 595–600. |
|                        | Wada Y, Kawai S, Ito S, Oda T, Nishigaki J, Suenaga O, Omori N, 1970. Ecology of vector mosquitoes of Japanese encephalitis, especially of <i>Culex tritaeniorhynchus</i> . 2. Nocturnal activity and host preference based on all-night-catches by different methods in 1965 and 1966 near Nagasaki city. <i>J Trop Med</i> 12: 79–89.                               |
|                        | Yamada T et al., 1971. Studies on an epidemic of Japanese encephalitis in the northern region of Thailand in 1969 and 1970. <i>Biken J</i> 14: 267–296.                                                                                                                                                                                                               |
